# Supplementary material
Source: PubMed Central journal article supplement (PMC5052486)
Supplement: mmc1.pdf [file mmc1.pdf]

**Biophysical Journal, Volume 111**

**Supplemental Information**

**Role of the Native Outer-Membrane Environment on the Transporter  
BtuB**

**Curtis Balusek and James C. Gumbart**

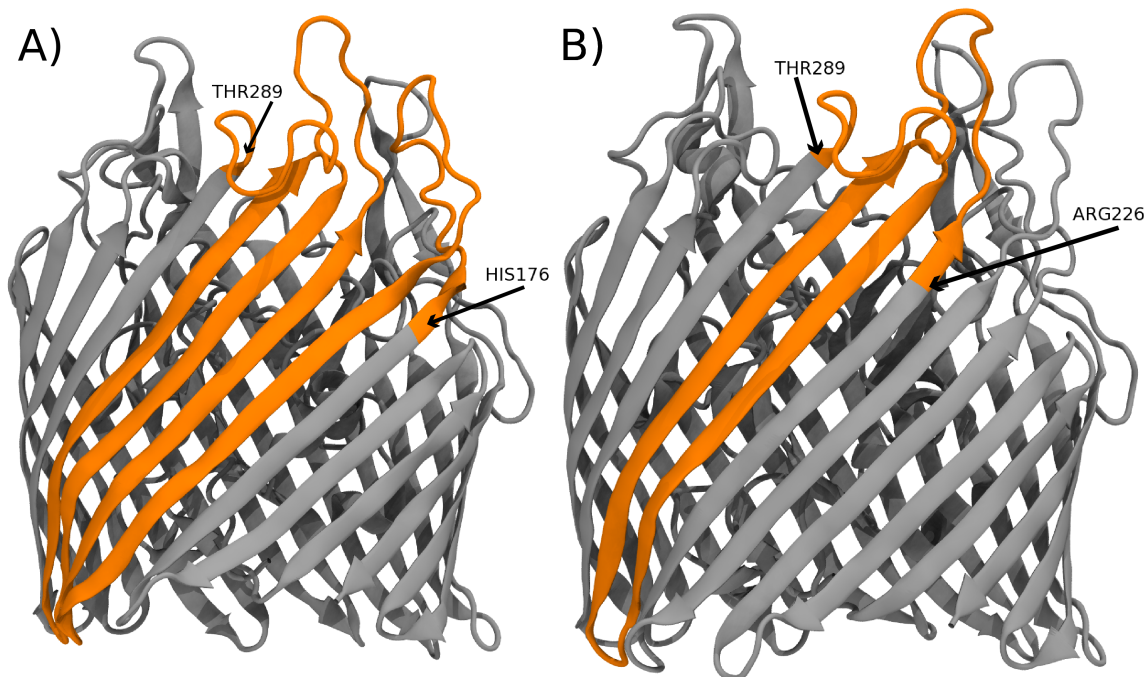

Figure S1: A graphical representation of the loop completions performed on the A) apo-state BtuB (PDB:1NQE) and the B) Ca<sup>2+</sup>-bound BtuB. Loop completions, shown in orange, utilized the TonB-bound BtuB structure (PDB: 2GSK).

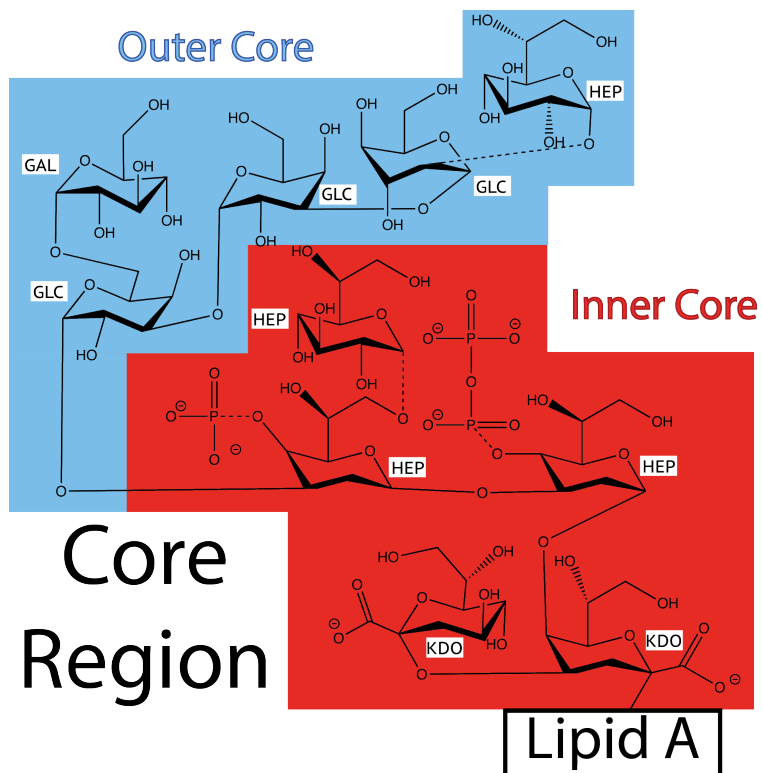

(A)

Figure S2: Chemical structure of the core oligosaccharide used in the model membrane simulations. Chemical structure is built in regards to the K12 *E. coli* oligosaccharide outlined in Nikaido 2003.

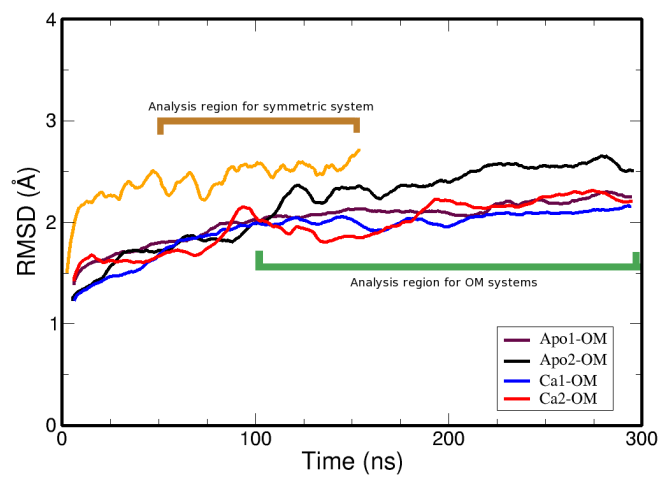

(A)

Figure S3: RMSD of the protein backbone for each simulated system compared to the CBL-bound crystal structure. Data regions used for analysis in each system has also been highlighted.

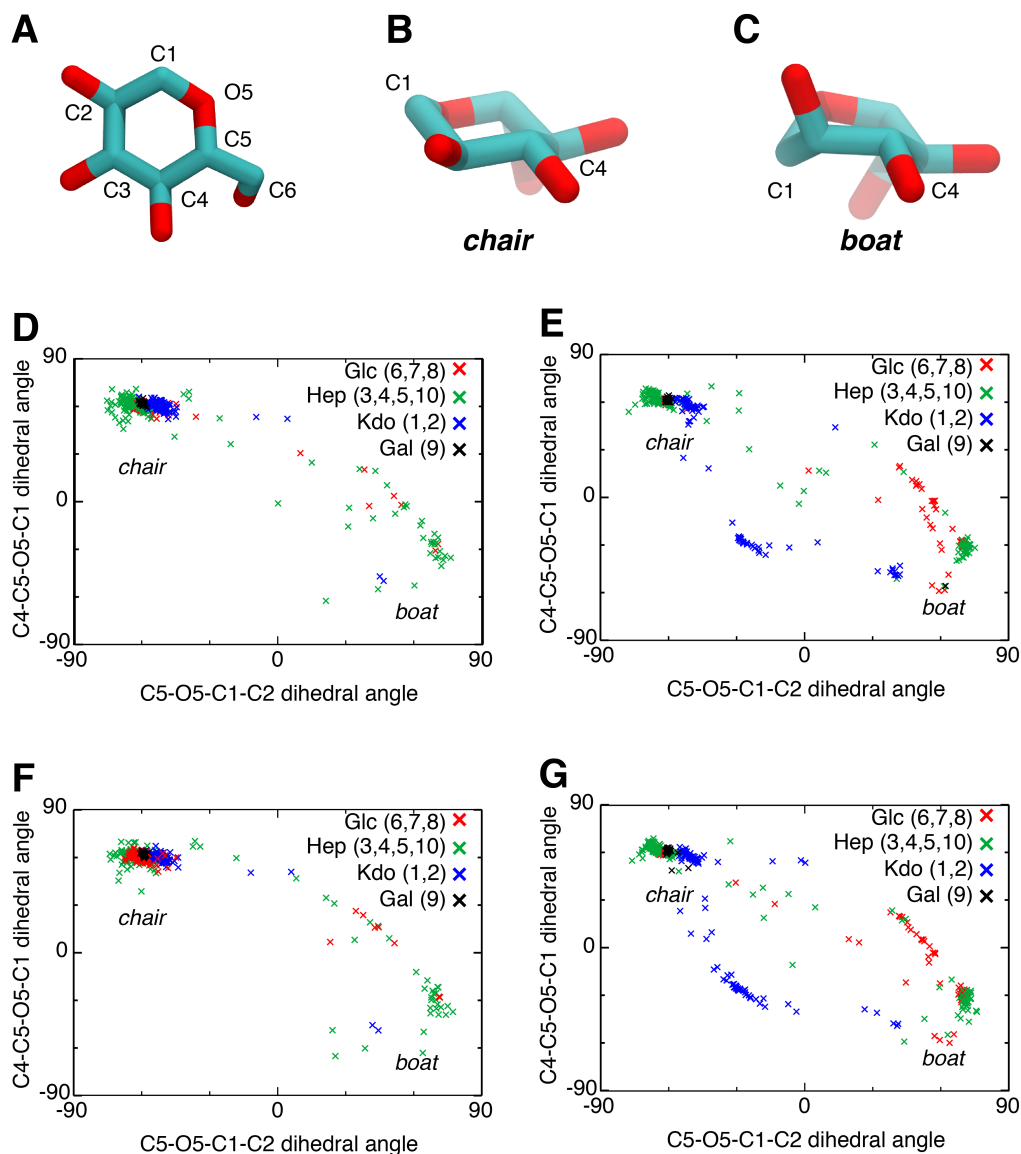

Figure S4: (A) Top down view of a pyranose ring, found in each of the sugars in the core oligosaccharide. The (B) chair conformation of a pyranose ring is the energetically favored conformation as compared to the (C) boat conformation. Determination of sugar conformation was done by measuring the dihedral angles on either side of the O5 oxygen. (D-G) include results from simulations of Apo1-OM, Apo2-OM, Ca1-OM, and Ca2-OM, respectively, as an average dihedral conformation throughout the trajectory.

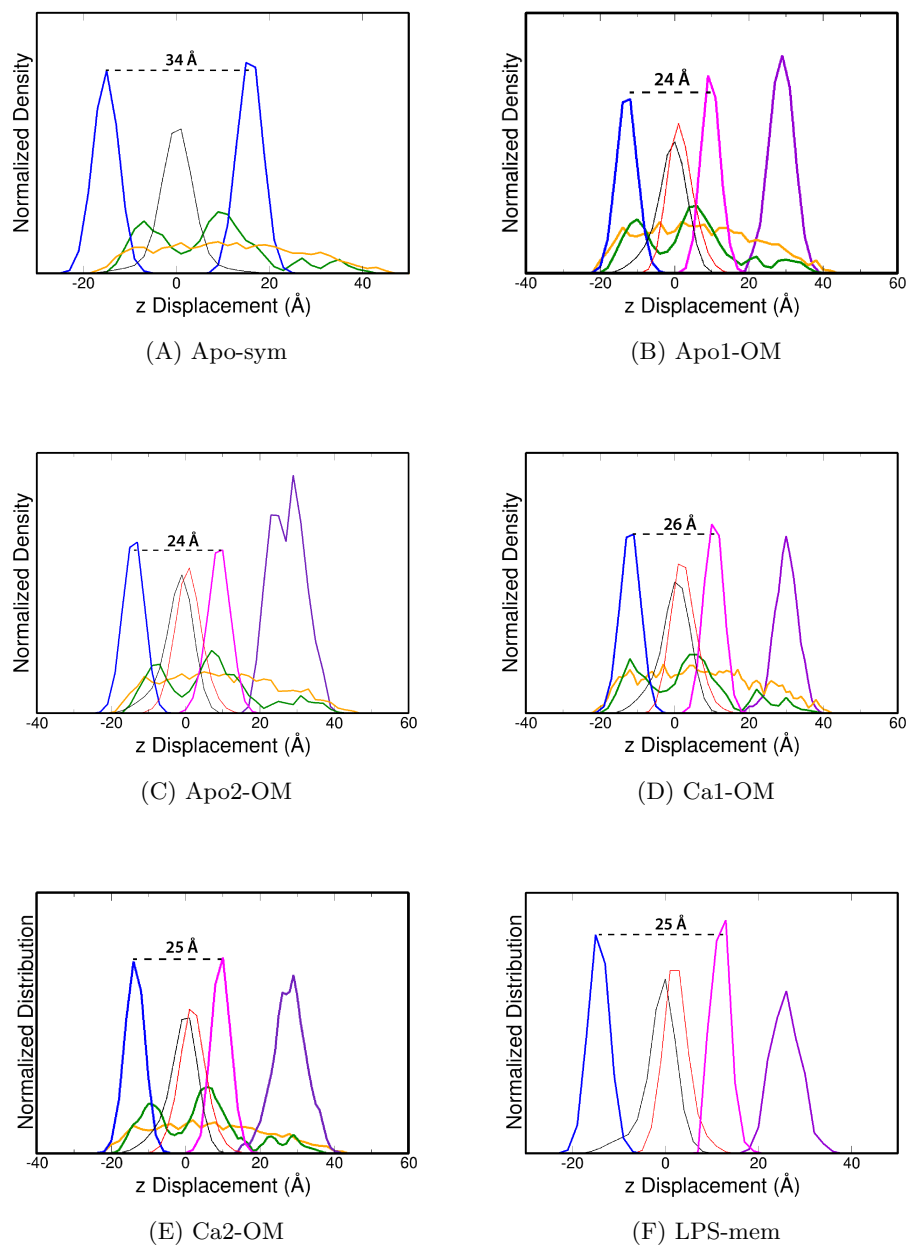

Figure S5: Plot of the hydrophobic thickness profiles for the simulated systems. In each system, the protein density from carbon<sub>α</sub> is shown in orange, lipid A acyl C2 and C4 atoms in magenta, the core oligosaccharides (LPS headgroup) in purple, POPE acyl C2 carbons in blue and the aromatic protein sidechains are in green. The number density of the last carbon atoms of the POPE acyl tails (black) and the last carbons on each of the lipid A tails (red) represent aliphatic tail interdigitation at 0 z-displacement. The hydrophobic thickness is determined between the blue and magenta curves, as indicated by the dashed line.

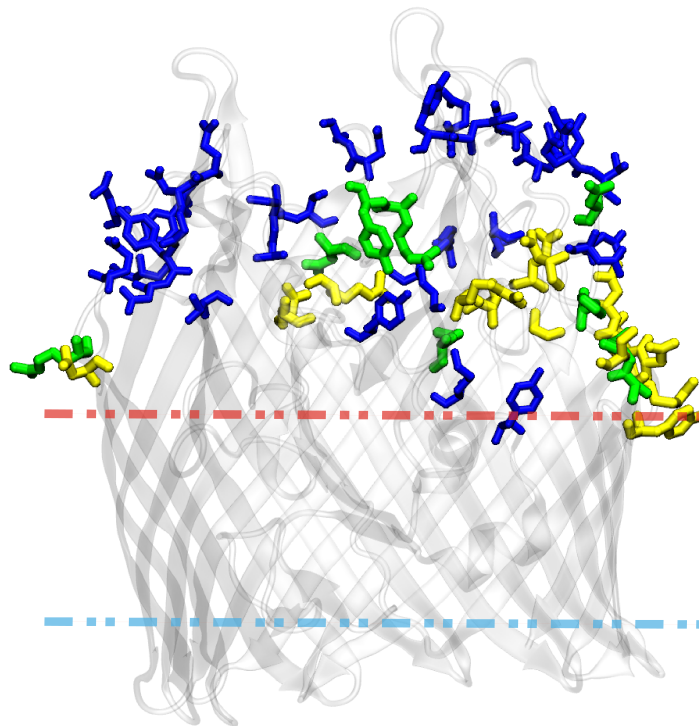

(A)

Figure S6: Representation of the amino acids that hydrogen bond with LPS (blue), POPE (yellow) or both (green). The hydrophobic matching region as determined from aromatic side chains is represented as red (extracellular) and blue (periplasmic) dashed lines. Side chains that interact with LPS tend to be much farther up the EC loops than those interacting with POPE.

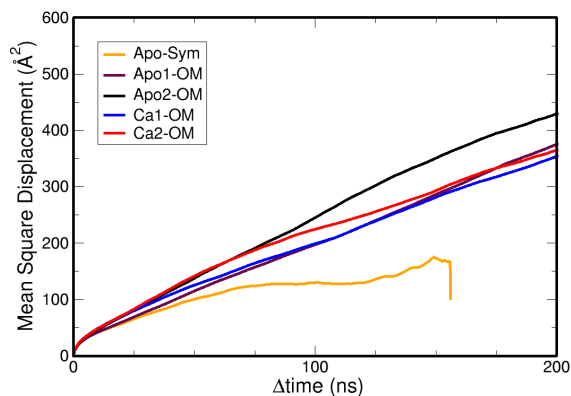

(A) Inner Leaflet of all systems

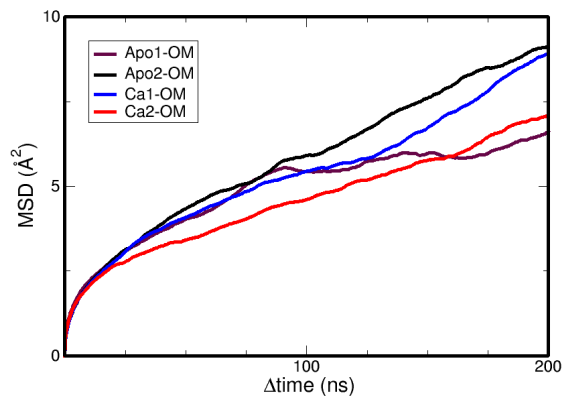

(B) Outer Leaflet of OM systems

Figure S7: Plots of Mean Square Displacement of (A) lipids in the inner phospholipid-containing leaflet and (B) outer LPS-containing leaflet. The diffusion coefficients for each leaflet are provided in Table S2.

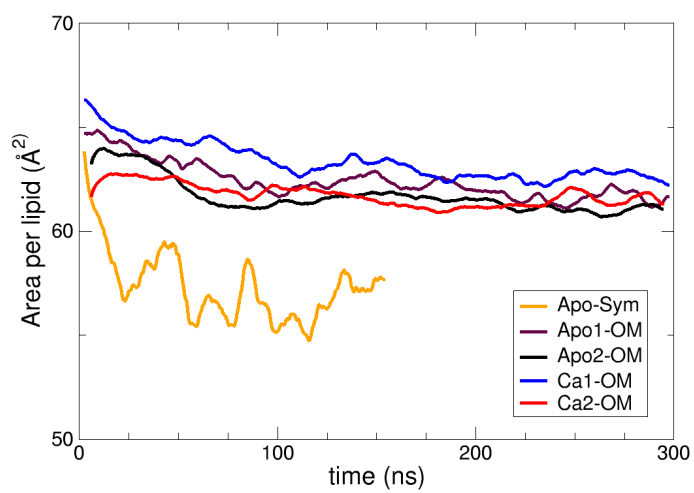

Figure S8: Plot of the area per lipid versus time for the inner phospholipid containing leaflet of each system. Each of the LPS-containing model membranes have an APL convergence around  $63 \text{ \AA}^2$ .



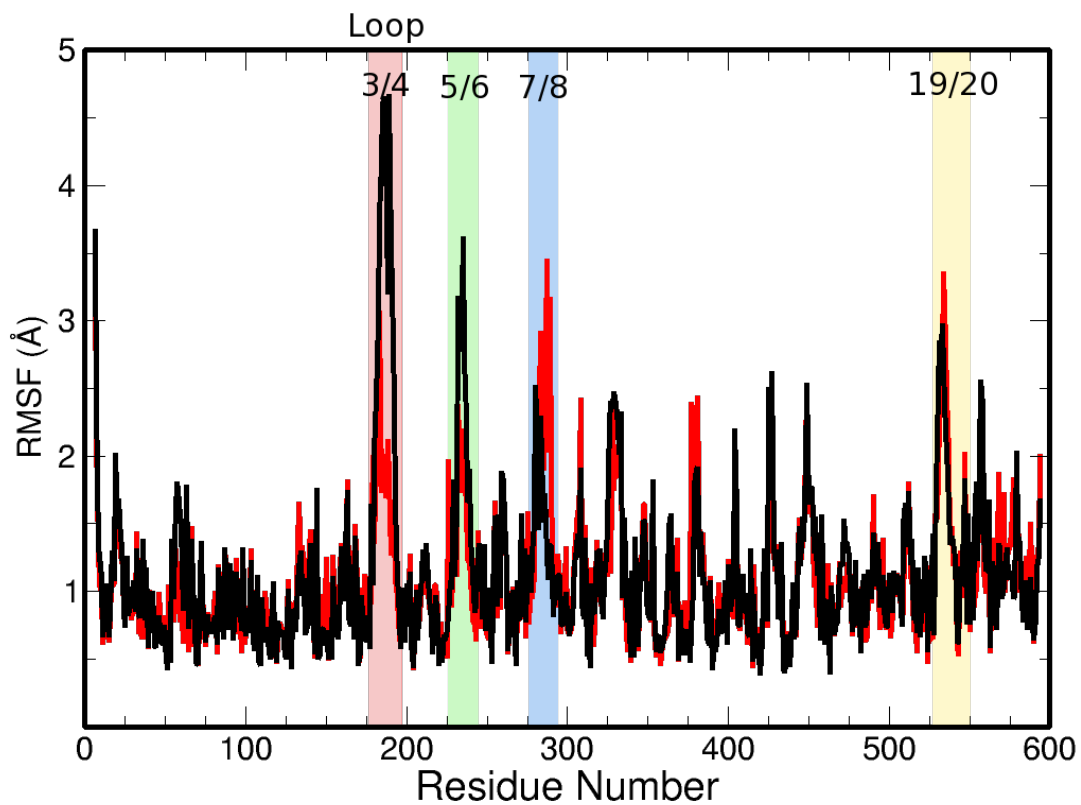

(A)

Figure S9: RMSF plots of Apo2-OM and Ca2-OM. Apo2-OM is shown in black and Ca2-OM is shown in red. Similar to the observations in Apo1- and Ca1-OM, there is a significant reduction in the fluctuation of loop 3/4 as well as a slight reduction in loop 5/6.

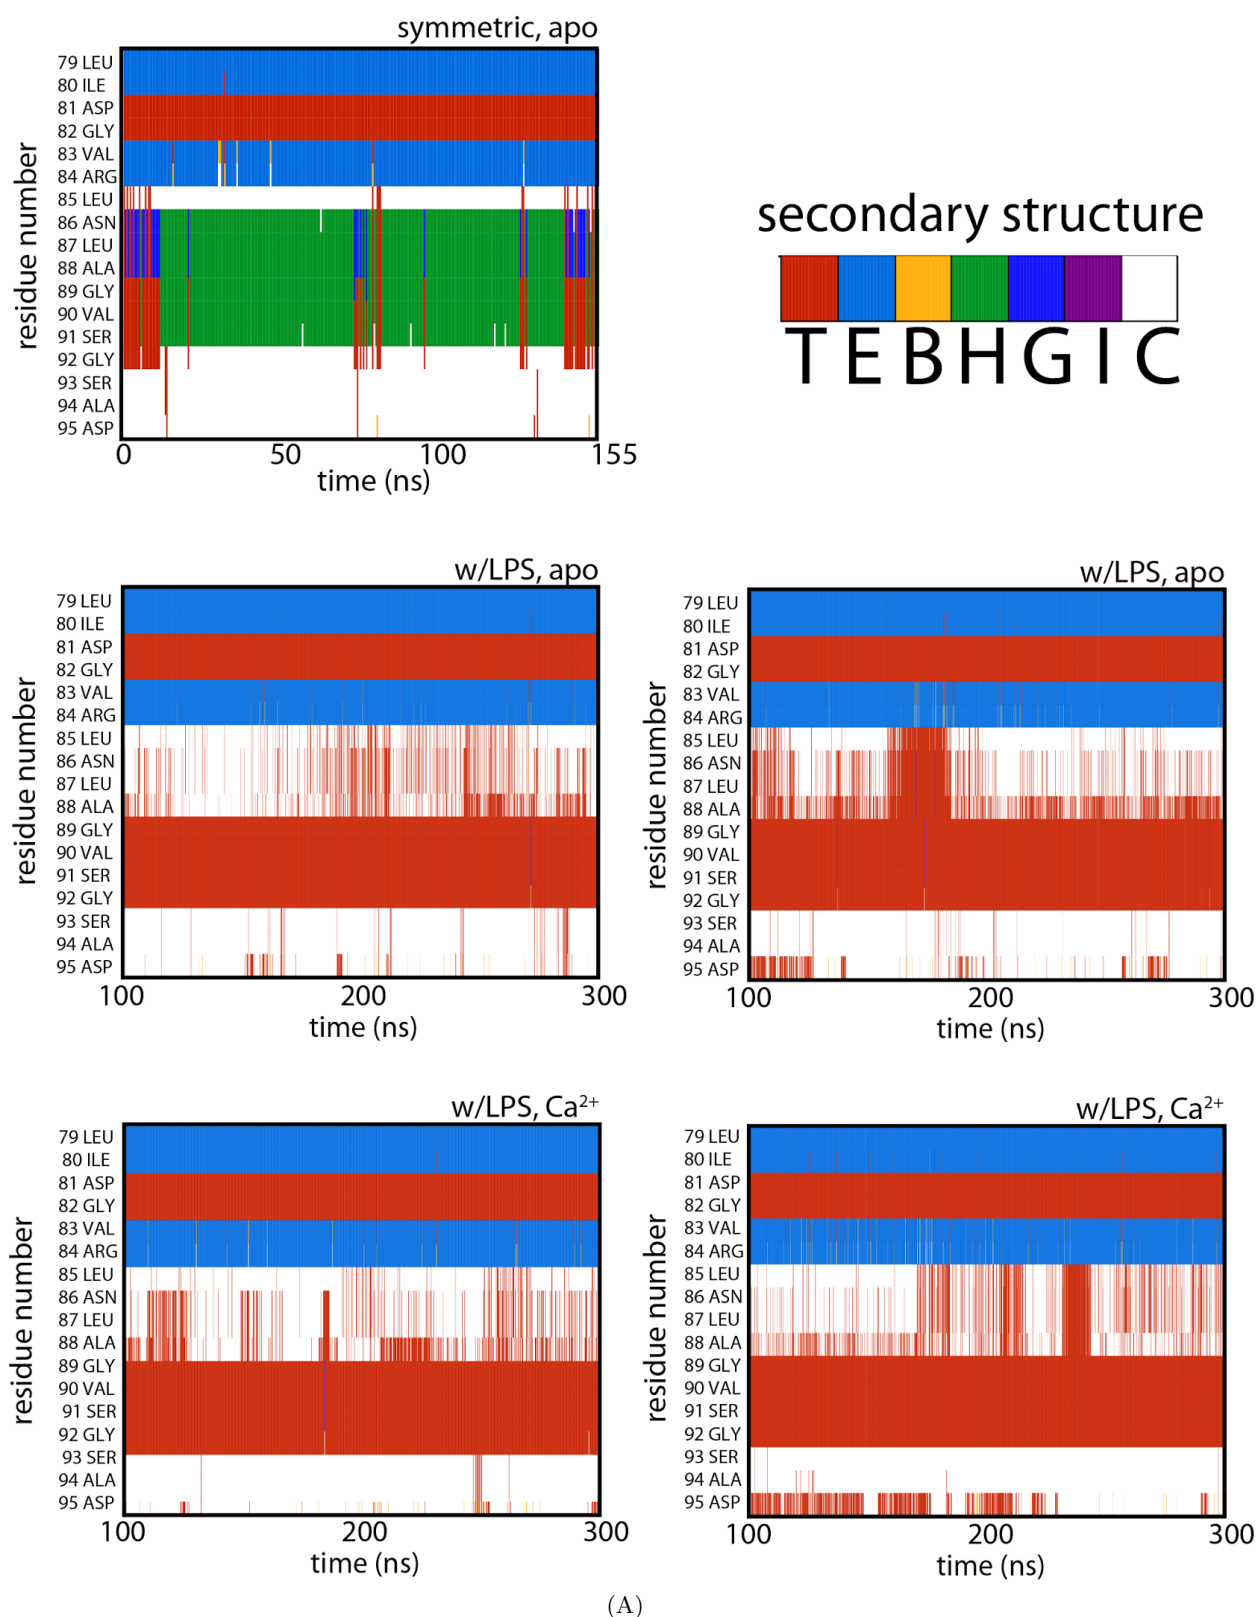

Figure S10: Timeline plots for the luminal domain region of Leu79 to Asp95. The  $\alpha$ -helix forms quickly in the Apo-sym simulation whereas the random coil is more prominent in the OM systems between residues Asn86 and Ser91. This random coil configuration permits Ser91 to be closer to the organization observed in the CBL-bound crystal structure.

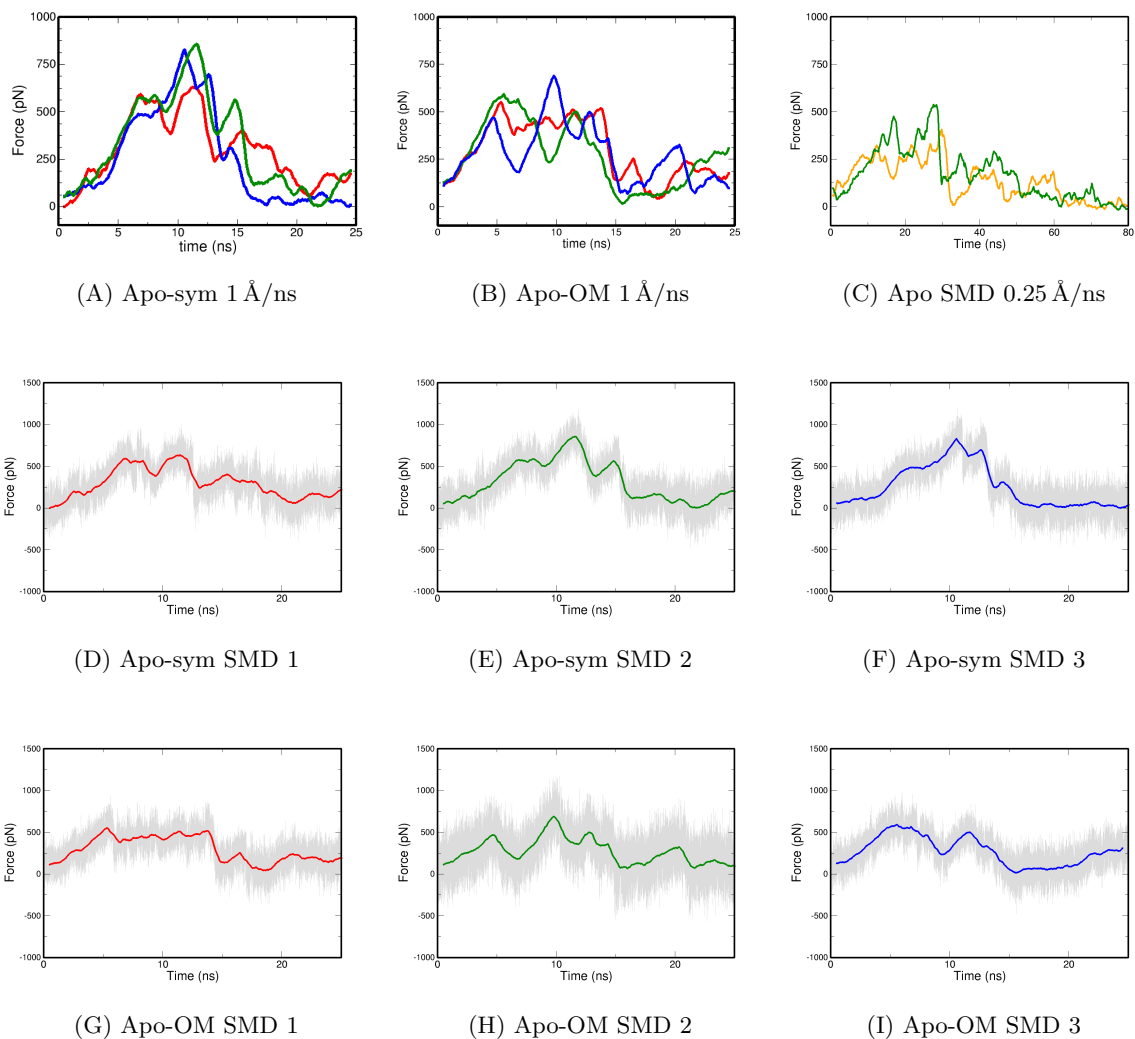

Figure S11: Time averaged plots from the SMD extraction of the Ton box. (A) Three separate SMD simulations at 1 Å/ns of luminal domain extraction in the Apo-sym simulation. Start frames were seeded from 100 ns (red), 100 ns (blue), and 150 ns (green). (B) Three separate SMD simulations at 1 Å/ns of luminal extraction in the Apo1-OM (red, blue) and Apo2-OM (green) simulation. Start frames were seeded from Apo1-OM at 100 ns (red), 150 ns (blue), and Apo2-OM at 100 ns (green). (C) Force curve from constant SMD lumen extraction performed at 0.25 Å/ns. The Apo-OM system (orange) produces a smaller extraction force compared to the Apo-sym system (green). (D-I) Plots of time averaged curves shown in (A) and (B) with accompanying raw data.

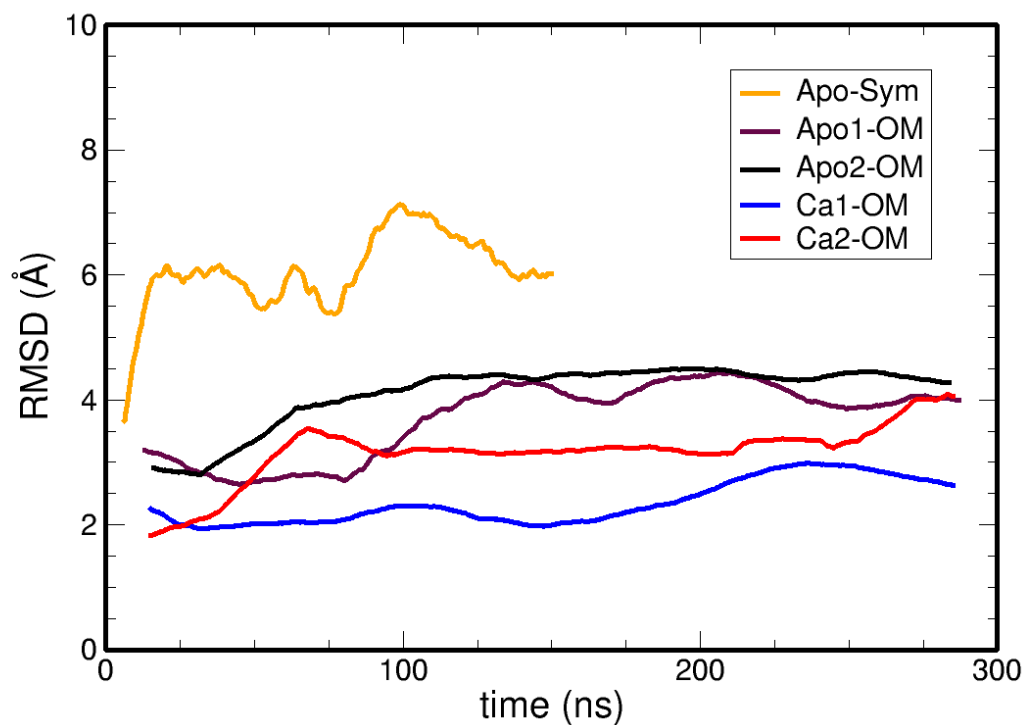

(A)

Figure S12: RMSD of Loop 3/4 in each of the simulated systems. RMSD was calculated for the sidechains and backbone of His176 to Lys200 in comparison to the CBL-bound crystal structure. Greatest amount of deviation ( $> 8\text{\AA}$ ) is observed in the Apo-sym system with decreased values for the Apo1- and Apo2- as well as Ca1- and Ca2-OM.

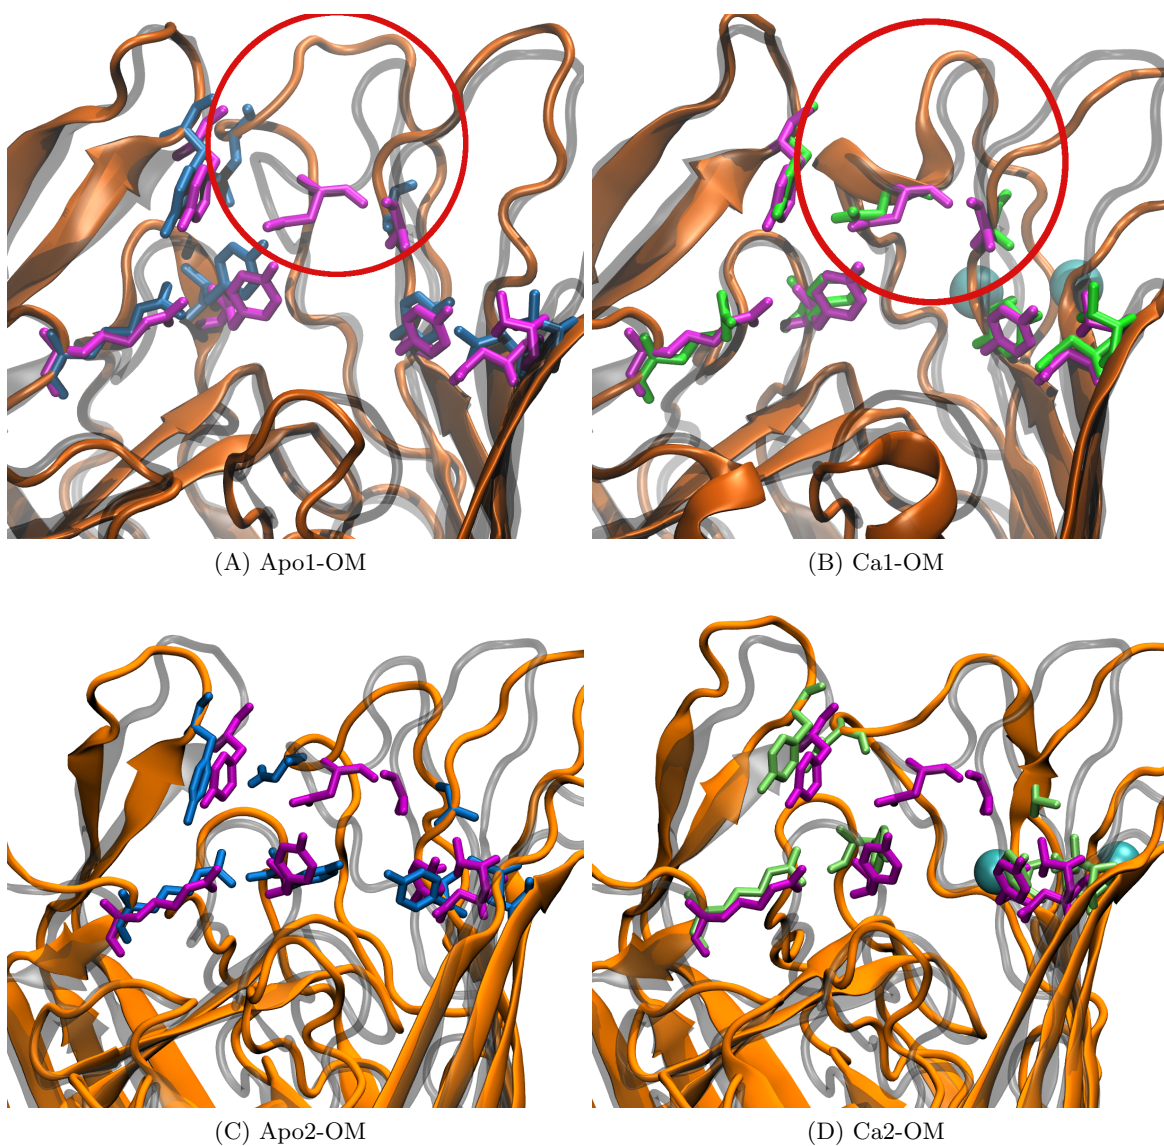

Figure S13: Comparison of the (A) Apo- and (B)  $\text{Ca}^{2+}$ -bound states of BtuB in the second simulated OM systems. (A) Apo-state BtuB (orange ribbon) aligned to the CBL-bound crystal structure (transparent grey ribbon) from Chimento et al. [37]. Residues within 4 Å of CBL in the CBL-bound crystal structure are highlighted as blue (Apo2-OM) and purple (crystal structure) sticks. (B)  $\text{Ca}^{2+}$ -bound BtuB (orange ribbon) aligned to the CBL-bound crystal structure (transparent grey ribbon). Calcium ions are shown as cyan spheres and the green sticks represent the CBL binding residues in the Ca2-OM system.

Table S1: Summary of systems. Lipid counts are reported in Table S2.

| System  | Atoms  | Water molecules | Ions |
|---------|--------|-----------------|------|
| Apo-sym | 69494  | 14823           | 99   |
| Apo1-OM | 137411 | 27019           | 452  |
| Apo2-OM | 137407 | 27019           | 448  |
| Ca1-OM  | 137407 | 27019           | 448  |
| Ca2-OM  | 137407 | 27019           | 448  |
| OM only | 71781  | 13068           | 207  |

Table S2: Summary of membrane results for each BtuB system.

| System (time ns) | Bilayer composition (Top:Bottom) | Diffusion Coefficient (cm <sup>2</sup> /s) | Area Per Lipid (Å <sup>2</sup> / Molecule) ± Std. Dev. | Hydrophobic Thickness (Å) |
|------------------|----------------------------------|--------------------------------------------|--------------------------------------------------------|---------------------------|
| Apo-sym (150 ns) | 66-POPE                          | $2.3 \times 10^{-8}$                       | $58.8 \pm 0.4$                                         | 34                        |
|                  | 61-POPE                          | $2.0 \times 10^{-8}$                       | $63.7 \pm 1.3$                                         |                           |
| Apo1-OM (300 ns) | 50-LPS                           | $7.2 \times 10^{-10}$                      | $194.6 \pm 1.6$                                        | 24                        |
|                  | 157-POPE                         | $4.4 \times 10^{-8}$                       | $61.9 \pm 0.5$                                         |                           |
| Apo2-OM (300 ns) | 50-LPS                           | $6.2 \times 10^{-10}$                      | $192.6 \pm 1.3$                                        | 24                        |
|                  | 157-POPE                         | $4.3 \times 10^{-8}$                       | $61.4 \pm 0.4$                                         |                           |
| Ca1-OM (300 ns)  | 50-LPS                           | $9.8 \times 10^{-10}$                      | $197.3 \pm 1.3$                                        | 26                        |
|                  | 157-POPE                         | $4.5 \times 10^{-8}$                       | $62.8 \pm 0.4$                                         |                           |
| Ca2-OM (300 ns)  | 50-LPS                           | $6.0 \times 10^{-10}$                      | $193.1 \pm 1.5$                                        | 25                        |
|                  | 157-POPE                         | $4.6 \times 10^{-8}$                       | $61.5 \pm 0.5$                                         |                           |
| OM only (172 ns) | 36-LPS                           | $8.1 \times 10^{-10}$                      | $178.9 \pm 0.6$                                        | 25                        |
|                  | 102-POPE                         | $6.4 \times 10^{-8}$                       | $63.1 \pm 1.4$                                         |                           |

Table S3: Summary of hydrogen bonds from the Apo1-OM and Apo2-OM systems. Occupancies over 100% are due to multiple hydrogen bonds forming simultaneously.

| BtuB Residue           | LPS component | Apo1-OM occ. | Apo2-OM occ. |
|------------------------|---------------|--------------|--------------|
| Loop 1/2               |               |              |              |
| SER146                 | LipidA        | 91.75        | -            |
| ASN147                 | LipidA        | 96.30        | -            |
| Loop 3/4               |               |              |              |
| TYR172                 | LipidA        | -            | 11.10        |
| ASP179                 | Gal           | 11.10        | -            |
| ASP179                 | Gal           | 21.80        | -            |
| ASP179                 | Gal           | 38.55        | -            |
| ASP179                 | Glc           | 124.85       | -            |
| ASP179                 | KDO           | -            | 13.95        |
| TYR183                 | KDO           | -            | 25.15        |
| TYR183                 | KDO           | -            | 10.50        |
| GLY184                 | Hep           | -            | 21.10        |
| THR186                 | Hep           | -            | 22.05        |
| Continued on next page |               |              |              |

Table S3 – continued from previous page

| BtuB Residue | LPS component | Apo1-OM occ. | Apo2-OM occ. |
|--------------|---------------|--------------|--------------|
| THR188       | Hep           | -            | 11.45        |
| THR192       | Hep           | 17.00        | -            |
| ASP193       | Hep           | 100.30       | -            |
| ASP193       | Gal           | 20.80        | 15.15        |
| ASP193       | Glc           | 18.85        | -            |
| ASP193       | Glc           | 15.30        | -            |
| ASN194       | Hep           | 17.35        | -            |
| ASN194       | Hep           | 24.10        | -            |
| ASN194       | Gal           | 15.00        | -            |
| ASN194       | Gal           | 19.20        | -            |
| LYS200       | LipidA        | -            | 73.05        |
| Loop 5/6     |               |              |              |
| ASP241       | Glc           | 23.70        | -            |
| THR242       | Glc           | 10.70        | -            |
| LYS244       | LipidA        | -            | 33.30        |
| TYR246       | LipidA        | -            | 53.35        |
| GLN248       | LipidA        | 29.40        | -            |
| TRP250       | LipidA        | -            | 10.70        |
| Loop 7/8     |               |              |              |
| HSE280       | Hep           | 11.00        | -            |
| TYR281       | Hep           | 11.25        | -            |
| ARG283       | KDO           | -            | 11.15        |
| ARG283       | LipidA        | -            | 14.95        |
| TYR284       | Hep           | -            | 28.05        |
| ASP285       | Hep           | 218.50       | 35.25        |
| ASP285       | Hep           | 61.25        | -            |
| SER286       | Hep           | 19.65        | -            |
| SER286       | Hep           | 44.65        | -            |
| SER287       | Glc           | -            | 11.00        |
| SER287       | Glc           | -            | 12.80        |
| Loop 9/10    |               |              |              |
| THR321       | KDO           | -            | 26.70        |
| THR321       | KDO           | -            | 61.00        |
| GLU330       | Glc           | 16.35        | -            |
| GLU330       | Gal           | 54.15        | -            |
| ASP331       | Glc           | 35.15        | 85.40        |
| ASP331       | Glc           | 36.00        | -            |
| ASP331       | Hep           | 27.60        | -            |
| GLY332       | Hep           | 66.10        | -            |
| GLY332       | Gal           | -            | 16.30        |
| GLY332       | Glc           | -            | 38.20        |
| TYR333       | Glc           | 19.40        | 10.45        |
| TYR333       | Glc           | 24.30        | -            |
| TYR333       | Hep           | -            | 23.95        |
| TYR333       | Hep           | -            | 14.15        |
| TYR333       | Gal           | -            | 11.20        |

Continued on next page

Table S3 – continued from previous page

| BtuB Residue | LPS component | Apo1-OM occ. | Apo2-OM occ. |
|--------------|---------------|--------------|--------------|
| ASP334       | Gal           | -            | 86.10        |
| Loop 11/12   |               |              |              |
| GLN364       | Gal           | 24.05        | 24.70        |
| ARG367       | KDO           | 76.65        | -            |
| ARG367       | LipidA        | 58.20        | 189.05       |
| Loop 13/14   |               |              |              |
| TYR402       | Gal           | 25.55        | 22.25        |
| TYR402       | Gal           | 11.55        | -            |
| PRO408       | Glc           | -            | 13.40        |
| ASN409       | Gal           | 17.35        | -            |
| ASN409       | Gal           | 10.75        | -            |
| ASN409       | Glc           | -            | 57.15        |
| ASN409       | Glc           | -            | 50.15        |
| ASP411       | Hep           | 15.75        | 27.15        |
| ASP411       | Glc           | 65.75        | -            |
| Loop 15/16   |               |              |              |
| ASP442       | Hep           | 117.45       | -            |
| GLU456       | Gal           | 51.80        | -            |
| GLU456       | Gal           | 22.75        | -            |
| ARG460       | Hep           | 17.65        | -            |
| Loop 19/20   |               |              |              |
| THR525       | LipidA        | 122.10       | -            |
| TYR527       | KDO           | 51.70        | -            |
| TYR527       | Hep           | -            | 116.35       |
| GLN537       | Glc           | 10.70        | 13.20        |
| GLN537       | Glc           | 22.10        | 19.10        |
| GLN537       | Hep           | 29.15        | -            |
| THR538       | Glc           | 37.45        | -            |
| LYS540       | LipidA        | 105.15       | -            |
| LYS540       | Glc           | 16.85        | -            |
| LYS540       | KDO           | 36.85        | -            |
| LYS540       | Hep           | 17.25        | 235.75       |
| Loop 21/22   |               |              |              |
| LEU568       | LipidA        | -            | 19.20        |
| ASP570       | LipidA        | -            | 146.15       |
| LYS571       | LipidA        | 34.50        | 191.10       |
| TYR577       | Hep           | -            | 42.75        |
| GLN580       | Gal           | 10.65        | -            |
| GLN580       | Gal           | 10.95        | -            |
| ARG584       | LipidA        | 20.70        | -            |
| ARG584       | KDO           | -            | 327.05       |
| TYR586       | LipidA        | 28.10        | -            |



Table S4: Summary of hydrogen bonds in the symmetric Apo-BtuB system.

| Symmetric-Apo |                |             |
|---------------|----------------|-------------|
| BtuB Residue  | POPE component | Occupancy % |
| Loop 1/2      |                |             |
| SER146        | PEhead         | 18.5        |
| ASN147        | PEhead         | 52.9        |
| SER148        | PEhead         | 40.3        |
| Loop 3/4      |                |             |
| HSE176        | PEhead         | 26.5        |
| ASP193        | PE-NH3         | 77.3        |
| ASP195        | PEhead         | 63.1        |
| Loop 5/6      |                |             |
| ARG226        | PEhead         | 83.7        |
| Loop 7/8      |                |             |
| ARG283        | PEhead         | 47.0        |
| TYR284        | PEhead         | 15.3        |
| Loop 11/12    |                |             |
| ASP361        | PE-NH3         | 20.6        |
| ARG367        | PEhead         | 45.5        |
| Loop 15/16    |                |             |
| ARG460        | PEhead         | 29.7        |
| Loop 17/18    |                |             |
| ASP492        | PE-NH3         | 82.5        |
| ARG487        | PEhead         | 19.9        |
| LYS500        | PEcore         | 28.9        |
| Loop 19/20    |                |             |
| THR525        | PE-NH3         | 97.8        |
| GLY543        | PEhead         | 35.8        |
| Loop 21/22    |                |             |
| ASP570        | PEhead         | 88.9        |
| ASP570        | PEcore         | 30.9        |
| ASP570        | PE-NH3         | 10.9        |
| LYS571        | PEcore         | 48.7        |
| LYS571        | PEhead         | 80.9        |
| ASP572        | PE-NH3         | 66.6        |
| GLU574        | PE-NH3         | 12.7        |
| ARG584        | PEhead         | 72.4        |
| ARG584        | PEcore         | 94.3        |
| TYR586        | PEcore         | 47.7        |

Table S5: Summary of hydrogen bonds from the Ca1-OM and Ca2-OM systems. Occupancies over 100% are due to multiple hydrogen bonds forming simultaneously.

| BtuB Residue           | LPS component | Ca1-OM occ. | Ca2-OM occ. |
|------------------------|---------------|-------------|-------------|
| Loop 1/2               |               |             |             |
| SER146                 | LipidA        | -           | 11.33       |
| Loop 3/4               |               |             |             |
| HSE174                 | LipidA        | -           | 102.20      |
| TYR183                 | Gal           | 17.65       | -           |
| ALA190                 | Gal           | 39.40       | -           |
| GLN191                 | Hep           | -           | 15.34       |
| GLN191                 | Gal           | 12.70       | -           |
| THR192                 | Hep           | 36.50       | 10.94       |
| THR192                 | Hep           | 12.55       | -           |
| THR192                 | Gal           | 10.60       | -           |
| ASP193                 | Hep           | -           | 93.06       |
| ASP193                 | Gal           | 12.55       | -           |
| ASN194                 | Hep           | 18.95       | -           |
| ASN194                 | Hep           | 14.75       | -           |
| ASN194                 | Glc           | 17.00       | -           |
| ASN194                 | Glc           | 46.75       | -           |
| Loop 5/6               |               |             |             |
| ARG226                 | LipidA        | -           | 148.38      |
| TYR246                 | LipidA        | 20.95       | 18.51       |
| GLN248                 | LipidA        | 23.70       | 13.70       |
| GLN248                 | LipidA        | 12.15       | -           |
| Loop 7/8               |               |             |             |
| ARG283                 | LipidA        | 157.75      | -           |
| TYR284                 | KDO           | -           | 50.19       |
| TYR284                 | KDO           | -           | 15.48       |
| TYR284                 | LipidA        | 16.85       | -           |
| TYR284                 | Hep           | -           | 19.97       |
| ASP285                 | Hep           | 66.20       | -           |
| ASP285                 | Glc           | 27.45       | -           |
| SER286                 | Hep           | 48.30       | -           |
| SER286                 | Hep           | 34.85       | -           |
| SER286                 | Glc           | 22.10       | -           |
| SER286                 | Glc           | 14.05       | -           |
| Loop 9/10              |               |             |             |
| GLU330                 | Hep           | 11.35       | -           |
| GLU330                 | Hep           | 12.05       | -           |
| ASP331                 | Glc           | 69.40       | -           |
| ASP331                 | Hep           | -           | 11.15       |
| ASP331                 | Hep           | -           | 54.62       |
| GLY332                 | Glc           | 19.65       | -           |
| TYR333                 | Glc           | 40.00       | -           |
| TYR333                 | Glc           | 29.55       | -           |
| TYR333                 | Gal           | -           | 14.43       |
| Continued on next page |               |             |             |

Table S5 – continued from previous page

| BtuB Residue | LPS component | Ca1-OM occ. | Ca2-OM occ. |
|--------------|---------------|-------------|-------------|
| ASP334       | KDO           | 88.15       | -           |
| ASP334       | Hep           | 41.55       | -           |
| ASP334       | Hep           | 19.55       | -           |
| Loop 11/12   |               |             |             |
| GLN364       | Gal           | -           | 13.07       |
| GLN364       | Glc           | -           | 19.66       |
| PHE365       | Hep           | -           | 14.88       |
| ARG367       | KDO           | 25.70       | 66.71       |
| ARG367       | LipidA        | 177.50      | 107.88      |
| Loop 13/14   |               |             |             |
| TYR402       | Glc           | 19.70       | -           |
| TYR402       | Glc           | 26.80       | -           |
| ASN409       | Glc           | -           | 17.15       |
| ASN409       | Glc           | -           | 23.35       |
| Loop 15/16   |               |             |             |
| SER441       | Hep           | -           | 37.05       |
| ASP442       | Hep           | -           | 50.26       |
| LYS458       | Hep           | 85.50       | 84.00       |
| ARG460       | Hep           | -           | 197.56      |
| Loop 17/18   |               |             |             |
| ARG487       | KDO           | 55.30       | -           |
| ARG487       | Hep           | 12.95       | 125.13      |
| ASP492       | Hep           | 14.50       | -           |
| LYS500       | LipidA        | 19.25       | -           |
| Loop 19/20   |               |             |             |
| TYR527       | Glc           | 15.45       | -           |
| GLN537       | Hep           | 14.25       | 19.52       |
| THR538       | Hep           | 15.60       | 51.03       |
| THR538       | Glc           | 13.15       | -           |
| LYS540       | Hep           | 16.55       | 139.94      |
| Loop 21/22   |               |             |             |
| ASP570       | Hep           | -           | 67.41       |
| LYS571       | LipidA        | 10.40       | 207.39      |
| LYS571       | KDO           | 16.00       | -           |
| TYR577       | Hep           | -           | 54.41       |
| GLN580       | Hep           | 10.60       | 11.99       |
| GLN580       | Hep           | 16.90       |             |
| THR581       | Hep           | -           | 11.89       |
| ARG584       | LipidA        | 167.90      | 84.07       |
| TYR586       | LipidA        | 30.90       | 56.54       |
